# Supplementary material for: Substrate recognition and cleavage-site selection by a single-subunit protein-only RNase P
Source: PubMed Central journal article supplement — Nucleic Acids Res. 2016 Feb 20;44(5):2323–36. doi: 10.1093/nar/gkw080 (PMC4797305; doi:10.1093/nar/gkw080), 2016-02-20
Supplement: supp_gkw080_Brillante_et_al_Supplementary_Data_R4.pdf [file supp_gkw080_Brillante_et_al_Supplementary_Data_R4.pdf]

## SUPPLEMENTARY DATA

### Substrate recognition and cleavage-site selection by a single-subunit protein-only RNase P

**Nadia Brillante<sup>1,†</sup>, Markus Gößringer<sup>2,†</sup>, Dominik Lindenhofer<sup>1</sup>, Ursula Toth<sup>1</sup>,  
Walter Rossmannith<sup>1,\*</sup> and Roland K. Hartmann<sup>2,\*</sup>**

<sup>1</sup>Center for Anatomy & Cell Biology, Medical University of Vienna, 1090 Vienna, Austria

<sup>2</sup>Institute of Pharmaceutical Chemistry, Philipps-University Marburg, 35037 Marburg, Germany

\*To whom correspondence should be addressed. Email: walter.rossmanith@meduniwien.ac.at  
Correspondence may also be addressed to Roland K. Hartmann. Email: roland.hartmann@staff.uni-marburg.de

†The authors wish it to be known that, in their opinion, the first 2 authors should be regarded as joint First Authors.

**Supplementary Table S1. Oligonucleotides used for cloning and site-directed mutagenesis of PRORP3.**

| Amino acid substitution | Forward                                  | Reverse                                  |
|-------------------------|------------------------------------------|------------------------------------------|
| none <sup>a</sup>       | GGCTCTAGACCATGGCTGGTACTGAT               | CGGCTCGAGTGAAGTCTGCCTTGTA                |
| T113S                   | CTAATGAATCATCTGTCTCTGCAGTTG<br>CACGACTAG | CTAGTCGTGCAACTGCAGAGACAGAT<br>GATTCATTAG |
| T113N                   | CTAATGAATCATCTGTCAATGCAGTTG<br>CACGACTAG | CTAGTCGTGCAACTGCATTGACAGAT<br>GATTCATTAG |
| R145N                   | GTGTATCGGTCCTAATCTGAGAACTT<br>ATGC       | GCATAAGTTCTCAGATTAGGGACCGA<br>TACAC      |
| R145D                   | GTGTATCGGTCCTGATCTGAGAACTT<br>ATGC       | GCATAAGTTCTCAGATCAGGGACCGA<br>TACAC      |

<sup>a</sup>Primer pair used for the cloning of the *A. thaliana* wild-type PRORP3 cDNA.

**Supplementary Table S2. Oligonucleotides used for site-directed mutagenesis and (PCR) cloning of RNA-substrate templates.**

| RNA substrate                                                                       | Forward                                                                                                                                       | Reverse                                                                                                                                       |
|-------------------------------------------------------------------------------------|-----------------------------------------------------------------------------------------------------------------------------------------------|-----------------------------------------------------------------------------------------------------------------------------------------------|
| U <sub>1</sub> -A <sub>72</sub> <sup>a</sup>                                        | TAGGATTTCCCTTTCTCGGGAGTAGCTCAGTC<br>CAAGTCCCGTCTCCCGATCCAGTCACCGGATGTGC                                                                       | GACTGAGCTACTCCCGAGAAAGGGAAAATCCTA<br>GCACATCCGGTACTGGATCGGGAGACGGGACTTG                                                                       |
| U <sub>-1</sub>                                                                     | CTATAGGATTTCCCTTTGCGGGAGTAGCTCAGTCG                                                                                                           | CGACTGAGCTACTCCCGCAAAGGGAAAATCCTATAG                                                                                                          |
| G <sub>-1</sub> , A <sub>73</sub> <sup>a</sup>                                      | TATAGGATTTCCCTTTGGCGGGAGTAGCTCAGTCG<br>CAAGTCCCGTCTCCCGCACCAGTCACCGGATGTGC                                                                    | CGACTGAGCTACTCCCGCAAAGGGAAAATCCTATA<br>GCACATCCGGTACTGGTGCGGGAGACGGGACTTG                                                                     |
| A <sub>-1</sub> , A <sub>73</sub> <sup>a</sup>                                      | CTATAGGATTTCCCTTTAGCGGGAGTAGCTCAGTCG<br>CAAGTCCCGTCTCCCGCACCAGTCACCGGATGTGC                                                                   | CGACTGAGCTACTCCCGTAAAGGGAAAATCCTATAG<br>GCACATCCGGTACTGGTGCGGGAGACGGGACTTG                                                                    |
| A <sub>73</sub>                                                                     | CAAGTCCCGTCTCCCGCACCAGTCACCGGATGTGC                                                                                                           | GCACATCCGGTACTGGTGCGGGAGACGGGACTTG                                                                                                            |
| G <sub>18</sub> →A <sub>18</sub>                                                    | GCGGGAGTAGCTCAGTCAGTAGAGCACGACCTTGC                                                                                                           | GCAAGGTCGTGCTCTACTGACTGAGCTACTCCCGC                                                                                                           |
| G <sub>19</sub> →A <sub>19</sub> ,<br>C <sub>56</sub> →U <sub>56</sub> <sup>a</sup> | TCGGGGTCGCGGGTTTAAAGTCCCGTCTCCCG<br>GGAGTAGCTCAGTCGATAGACGACCTTGC                                                                             | CGGGAGACGGGACTTAAACCCGCGACCCCGA<br>GCAAGGTCGTGCTCTATCGACTGAGCTACTCC                                                                           |
| C <sub>56</sub> →U <sub>56</sub>                                                    | TCGGGGTCGCGGGTTTAAAGTCCCGTCTCCCG                                                                                                              | CGGGAGACGGGACTTAAACCCGCGACCCCGA                                                                                                               |
| A <sub>57</sub> →C <sub>57</sub>                                                    | GGTCGCGGGTCCAGTCCCGTCTCC                                                                                                                      | GGAGACGGGACTGGAACCCGCGACC                                                                                                                     |
| U <sub>65</sub> →C <sub>65</sub> <sup>b</sup>                                       | GGTCAAGTCCCGCTCCCGTCCAGT                                                                                                                      | ACTGGAGCGGGAGGCGGGACTTGAACC                                                                                                                   |
| Aa <sub>b1</sub> T <sup>c</sup>                                                     | TTCCCTTTGCGGGAGAGCGGGTTCAAGTC                                                                                                                 | GACTTGAACCCGCTCTCCCGCAAAGGGAA                                                                                                                 |
| Aa <sub>b4</sub> T <sup>d</sup>                                                     | TTCCCTTTGCGGGAGAGCTGCGGGTTCAAGTC<br>GGAATTGTGAGCGGATAACA                                                                                      | GGTCTGCTTCAAGTAAAGCCAG<br>GACTTGAACCCGAGCTCTCCCGCAAAGGGAA                                                                                     |
| Aa <sub>b9</sub> T <sup>d</sup>                                                     | TTCCCTTTGCGGGAGCCAGCTCTGCGGGTTCAAGTC<br>GGAATTGTGAGCGGATAACA                                                                                  | GGTCTGCTTCAAGTAAAGCCAG<br>GACTTGAACCCGAGGAGCTGGCTCCCGCAAAGGG<br>AA                                                                            |
| AaT                                                                                 | AATTCGAGCTCGCCTAATACGACTCACTATAGGATTTT<br>CCCTTTGCGGGAGGCGGGTTCAAGTCCCGCTCCCG<br>CTCCAGTACCGGATGTGCTTTCCGGTCTGATGAGTCC<br>GTGAGGACGAACTGGTATG | GATCCATACCAGTTTCGTCTCACGGACTCATCAGACC<br>GGAAAGCACATCCGGTACTGGAGCGGGAGGCGGG<br>ACTTGAACCCGCTCCCGCAAAGGGAAAATCCTATA<br>GTGAGTCGTATTAGGCGAGCTCG |
| Aa <sub>-2bp</sub> <sup>a</sup>                                                     | GTTCAAGTCCCGTCTCGCTCCAGTACCG<br>ACTATAGGATTTCCCTTTGCGGAGTAGCTCAGTCGG                                                                          | CGGTGACTGGAGCGAGACGGGACTTGAAC<br>CCGACTGAGCTACTCGCAAAGGGAAAATCCTATAGT                                                                         |
| Aa <sub>+2bp</sub> <sup>a</sup>                                                     | TCAAGTCCCGTCTCCGGCGCTCCAGTACCC<br>TAGGATTTCCCTTTGCGCCGAGTAGCTCAGTC                                                                            | GGTACTGGAGCGCCGAGACGGGACTTGA<br>GACTGAGCTACTCCGGCGCAAAGGGAAAATCCTA                                                                            |

<sup>a</sup>Primer pairs for 2 rounds of site-directed mutagenesis.

<sup>b</sup>Used to generate the plasmid encoding pre-tRNA<sup>Gly</sup>-U<sub>65</sub>→C<sub>65</sub>, used as a template for further mutagenesis only.

<sup>c</sup>Plasmid encoding pre-tRNA<sup>Gly</sup>-U<sub>65</sub>→C<sub>65</sub> was used as a DNA template in the mutagenesis.

<sup>d</sup>Primer pairs to produce 2 overlapping PCR products from plasmid encoding pre-tRNA<sup>Gly</sup>-U<sub>65</sub>→C<sub>65</sub>.

**Supplementary Table S3. Oligonucleotides used for “inside-out” PCR mutagenesis of RNA-substrate templates.**

| RNA substrate | Forward primer                                                      | Reverse primer                                                            |
|---------------|---------------------------------------------------------------------|---------------------------------------------------------------------------|
| 7-nt leader   | AGGACGAAACGGTACCCGGTACCGTCCCCTTC<br>GCGGGAGTAGCTCAGTCGGTAGAGCACGACC | CACGGACTCATCAGCCCTTCGCTCCTATAGTGAGTC<br>GTATTAGGGCGAGCTCGAATTCGTAATCATGG  |
| 4-nt leader   | AGGACGAAACGGTACCCGGTACCGTCTTTCGCG<br>GGAGTAGCTCAGTCGGTAGAGCACGACC   | CACGGACTCATCAGTTTCGCGGCTCCTATAGTGAGT<br>CGTATTAGGGCGAGCTCGAATTCGTAATCATGG |
| 2-nt leader   | AGGACGAAACGGTACCCGGTACCGTCCCGCGG<br>GAGTAGCTCAGTCGGTAGAGCACGACC     | CACGGACTCATCAGCCGCGGGACTCCTATAGTGAGT<br>CGTATTAGGGCGAGCTCGAATTCGTAATCATGG |
| 1-nt leader   | AGGACGAAACGGTACCCGGTACCGTCCCGGG<br>AGTAGCTCAGTCGGTAGAGCACGACC       | CACGGACTCATCAGCGGGGAGCTCCTATAGTGAGT<br>CGTATTAGGGCGAGCTCGAATTCGTAATCATGG  |

**Supplementary Table S4. Oligonucleotides used to prepare RNA-substrate templates by PCR.**

| RNA substrate                                                    | Forward primer                                              | Reverse primer                                  |
|------------------------------------------------------------------|-------------------------------------------------------------|-------------------------------------------------|
| (mature) CCA <sup>a</sup>                                        | CTCGAGTAATACGACTCACTATAGG                                   | TGGAGCGGGAGACGGGACTT                            |
| no trailer <sup>a</sup>                                          | CTCGAGTAATACGACTCACTATAGG                                   | AGCGGGAGACGGGACTT                               |
| 40-nt trailer <sup>a</sup>                                       | CTCGAGTAATACGACTCACTATAGG                                   | TCCTCACGGACTCATCAG                              |
| ΔAc <sup>b</sup>                                                 | TAATACGACTCACTATAGG                                         | TATTGGAGCGGGAGACG                               |
| ΔD <sup>b</sup>                                                  | TAATACGACTCACTATAGG                                         | TATTGGAGCGGGAGACG                               |
| Aa <sub>b9</sub> T-U <sub>54</sub> →C <sub>54</sub> <sup>c</sup> | CTCGAGTAATACGACTCACTATAGGATT<br>TTCCTTTTCGCGGGAGCCAGCTCCTG  | GACTGGAGCGGGAGGCGGGACTTGAG<br>CCCGCAGGAGCTGGC   |
| Aa <sub>b9</sub> T-U <sub>55</sub> →C <sub>55</sub> <sup>c</sup> | CTCGAGTAATACGACTCACTATAGGATT<br>TTCCTTTTCGCGGGAGCCAGCTCCTG  | GACTGGAGCGGGAGGCGGGACTTGGA<br>CCCGCAGGAGCTGGC   |
| Aa <sub>b9</sub> T-C <sub>56</sub> →U <sub>56</sub> <sup>c</sup> | CTCGAGTAATACGACTCACTATAGGATT<br>TTCCTTTTCGCGGGAGCCAGCTCCTG  | GACTGGAGCGGGAGGCGGGACTTAAA<br>CCCGCAGGAGCTGGC   |
| Aa <sub>b9</sub> T-A <sub>57</sub> →G <sub>57</sub> <sup>c</sup> | CTCGAGTAATACGACTCACTATAGGATT<br>TTCCTTTTCGCGGGAGCCAGCTCCTG  | GACTGGAGCGGGAGGCGGGACTCGAA<br>CCCGCAGGAGCTGGC   |
| Aa <sub>b9</sub> T-A <sub>57</sub> →C <sub>57</sub> <sup>c</sup> | CTCGAGTAATACGACTCACTATAGGATT<br>TTCCTTTTCGCGGGAGCCAGCTCCTG  | GACTGGAGCGGGAGGCGGGACTGGAA<br>CCCGCAGGAGCTGGC   |
| Aa <sub>b9</sub> T-A <sub>57</sub> →U <sub>57</sub> <sup>c</sup> | CTCGAGTAATACGACTCACTATAGGATT<br>TTCCTTTTCGCGGGAGCCAGCTCCTG  | GACTGGAGCGGGAGGCGGGACTAGAA<br>CCCGCAGGAGCTGGC   |
| Aa <sub>b9</sub> T-A <sub>58</sub> →G <sub>58</sub> <sup>c</sup> | CTCGAGTAATACGACTCACTATAGGATT<br>TTCCTTTTCGCGGGAGCCAGCTCCTG  | GACTGGAGCGGGAGGCGGGACTGAA<br>CCCGCAGGAGCTGGC    |
| Aa <sub>b9</sub> T <sub>CCUUUUU</sub> <sup>c</sup>               | CTCGAGTAATACGACTCACTATAGGATT<br>TTCCTTTTCGCGGGAGCCAGCTCCTG  | GACTGGAGCGGGAGGCGGGTAAAAGG<br>CCCGCAGGAGCTGGC   |
| Aa <sub>+2bp</sub> b <sub>9</sub> T <sup>c</sup>                 | CTCGAGTAATACGACTCACTATAGGATT<br>TTCCTTTTCGCGCCGAGCCAGCTCCTG | GACTGGAGCGCCGAGGCGGGACTTG<br>AACCCGAGGAGCTGGC   |
| Aa <sub>b9</sub> T <sub>+2bp</sub> <sup>c</sup>                  | CTCGAGTAATACGACTCACTATAGGATT<br>TTCCTTTTCGCGGGAGCCAGCTCCTG  | GACTGGAGCGGGAGGCGCCGACTTG<br>AACCGCGCAGGAGCTGGC |
| Aa <sub>-2bp</sub> b <sub>9</sub> T <sub>+2bp</sub> <sup>c</sup> | CTCGAGTAATACGACTCACTATAGGATT<br>TTCCTTTTCGCGAGCCAGCTCCTG    | GACTGGAGCGAGGCGCCGACTTGAAC<br>CGGCGCAGGAGCTGGC  |
| Aa <sub>b9</sub> T <sub>4loop</sub> <sup>c</sup>                 | CTCGAGTAATACGACTCACTATAGGATT<br>TTCCTTTTCGCGGGAGCCAGCTCCTG  | GACTGGAGCGGGAGGCGGGTTTCCCCG<br>CAGGAGCTGGC      |
| Aa <sub>+4bp</sub> <sup>b</sup>                                  | CTCGAGTAATACGACTCACTATAGG                                   | GACTGGAGCGCGCCGGAGA                             |
| Aa <sub>+m3GC</sub> <sup>b</sup>                                 | CTCGAGTAATACGACTCACTATAGG                                   | GACTGGAGCGAGCCGGAGA                             |
| Aa <sub>+m3AU</sub> <sup>b</sup>                                 | CTCGAGTAATACGACTCACTATAGG                                   | GACTGGAATAAGCCGGAGA                             |
| G <sub>-1</sub> -C <sub>73</sub> <sup>d</sup>                    | CTCGAGTAATACGACTCACTATAGG                                   | GACTGGGGCGGGAGA                                 |
| U <sub>-1</sub> -A <sub>73</sub> <sup>e</sup>                    | CTCGAGTAATACGACTCACTATAGG                                   | GACTGGTGCGGGAGA                                 |
| Aa <sub>+3AU</sub> <sup>a</sup>                                  | CGAGTAATACGACTCACTATAGGATTTT<br>CCCTTCAATGCGGGAGTAGC        | GACTGGAATGCGGGAGAC                              |

<sup>a</sup>Plasmid pSBpt3'hh was used as a template.

<sup>b</sup>Oligonucleotide template listed in Supplementary Table S6.

<sup>c</sup>Overlapping primers (no extra template).

<sup>d</sup>Pre-tRNA<sup>Gly</sup>-G<sub>-1</sub> was used as a template.

<sup>e</sup>Pre-tRNA<sup>Gly</sup>-U<sub>-1</sub> was used as a template.

**Supplementary Table S5. Oligonucleotide templates used for PCR of RNA-substrate templates.**

| RNA substrate                            | Oligonucleotide template                                                                                                   |
|------------------------------------------|----------------------------------------------------------------------------------------------------------------------------|
| Aa <sub>+4bp</sub> & Aa <sub>+m3GC</sub> | TAATACGACTCACTATAGGATTTTCCCTTTCGCGCGCCGGAGTAGCTCAGTCGGTAGAGC<br>ACGACCTTGCCAAGGTCGGGGTCGCGGGTTCAAGTCCCGTCTCCGGCGCGCTCCAGTC |
| Aa <sub>+m3AU</sub>                      | TAATACGACTCACTATAGGATTTTCCCTTTCATACGCCGGAGTAGCTCAGTCGGTAGAGCA<br>CGACCTTGCCAAGGTCGGGGTCGCGGGTTCAAGTCCCGTCTCCGGCGTATTCCAGTC |
| ΔD                                       | TAATACGACTCACTATAGGATTTTCCCTTTCGCGGGAGTAGACCGACCTTGCCAAGGTCG<br>GGTCGCGGGTTCAAGTCCCGTCTCCCGCTCCAATA                        |
| ΔAC                                      | TAATACGACTCACTATAGGATTTTCCCTTTCGCGGGAGTAGCTCAGTCGGTAGAGCACCTT<br>CGGGGGTTCGCGGGTTCAAGTCCCGTCTCCCGCTCCAATA                  |

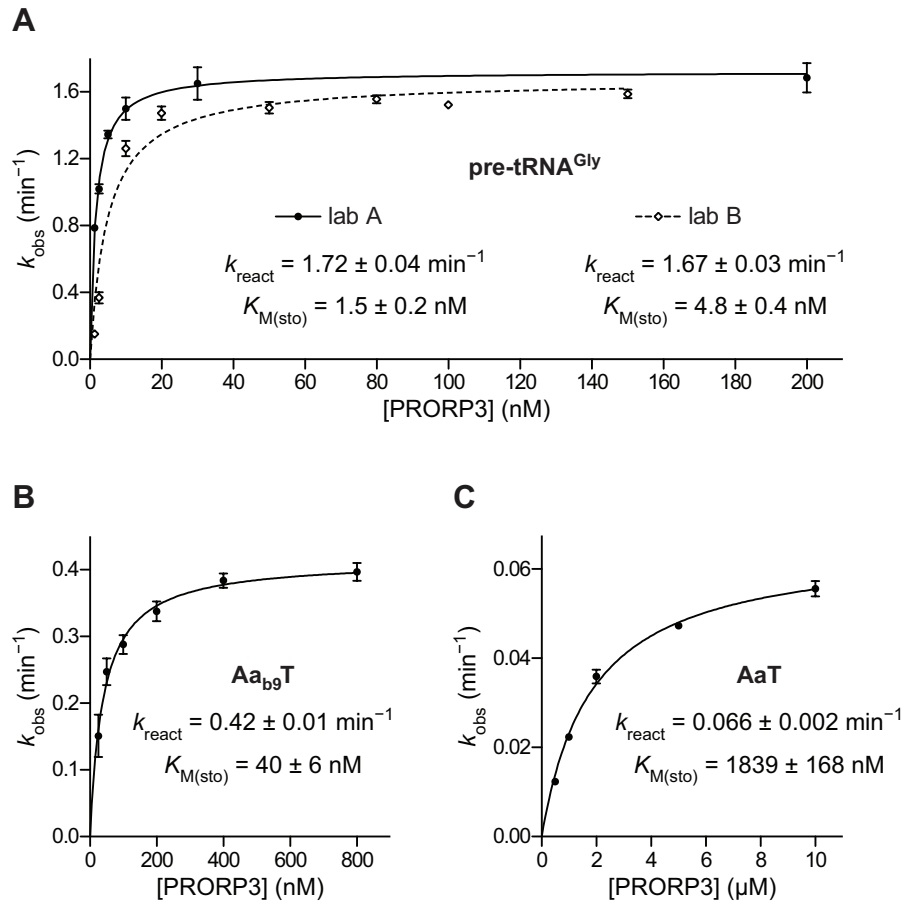

**Supplementary Figure S1. Single-turnover cleavage kinetics of representative substrates.** First-order rate constants of cleavage ( $k_{\text{obs}}$ ) obtained at different PRORP3 concentrations were plotted against the enzyme concentration and fit by nonlinear regression to a “Michaelis-Menten-like” enzyme kinetics model to derive the maximal rate constant  $k_{\text{react}}$  and the single-turnover Michaelis constant  $K_{\text{M(sto)}}$ . Data points represent the mean of at least 3 replicates with SEM (error bars display only if SEM exceeds the size of the data point in the graph). **(A)** Kinetic analysis of pre-tRNA<sup>Gly</sup> cleavage by PRORP3 independently performed by the two labs. **(B)** Kinetic analysis of the cleavage of the minimal substrate Aa<sub>b9</sub>T by PRORP3. **(C)** Kinetic analysis of the cleavage of the stem-loop substrate AaT by PRORP3.

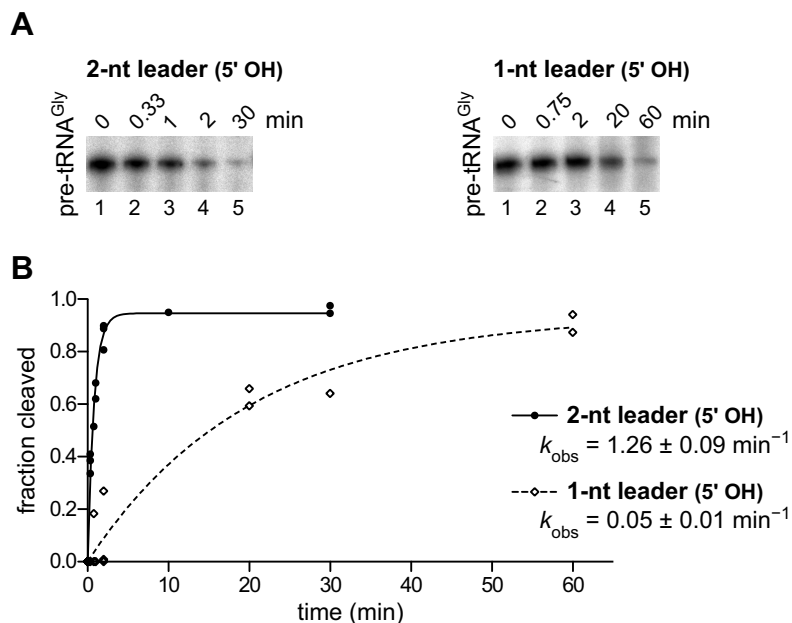

**Supplementary Figure S2. Cleavage analysis of pre-tRNA<sup>Gly</sup> variants with a short 5'-hydroxyl-end leader.** (A) Unlabeled pre-tRNA<sup>Gly</sup> variants with a 5'-hydroxyl-end leader of 1 or 2 nt were cleaved with PRORP3 under presumably enzyme-saturated conditions (80 nM). Aliquots of the reactions were withdrawn at indicated times, and the RNA <sup>32</sup>P-5'-end labeled and resolved by denaturing PAGE. The panels show the substrate RNA remaining after the reaction time indicated. (B) First-order rate constants of cleavage ( $k_{\text{obs}}$ ; best-fit values  $\pm$  standard error) for the two substrates were derived from the data of three experiments each. Individual data points are shown ("substrate remaining" converted to "fraction cleaved"; note: in the three replicate experiments some sampling time points differed).



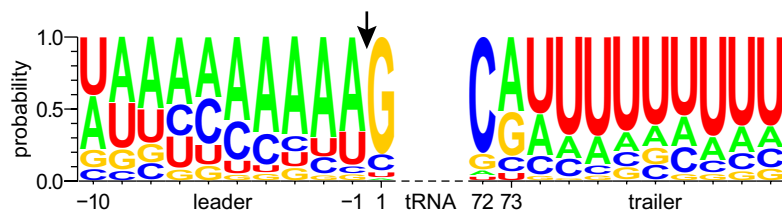

**Supplementary Figure S3. Nucleotide frequencies of the 5'-leader and 3'-trailer sequences of the nucleus-encoded pre-tRNAs of *A. thaliana*.**

Nucleotides upstream of the 5' end and downstream of the 3' end of the mature tRNA, including the first base pair of the tRNAs' nucleotides 1 and 72, and the discriminator position 73, were aligned, and a logo derived from the alignment of the 598 sequences. An arrow indicates the canonical RNase P cleavage site.

**Supplementary Table S6. Base-pair frequencies at the RNase P cleavage site of the nucleus-encoded pre-tRNAs of *A. thaliana*.**

| Base-paired positions <sup>a</sup> | G-C/C-G bp | A-U/U-A/G-U/U-G bp | G-C/C-G as 1 <sup>st</sup> or 2 <sup>nd</sup> upstream bp <sup>b</sup> |
|------------------------------------|------------|--------------------|------------------------------------------------------------------------|
| +1 - 72                            | 92.0%      | 7.0%               |                                                                        |
| -1 - 73                            | 1.0%       | 22.9%              |                                                                        |
| -2 - 74                            |            |                    |                                                                        |
| -1 - 73                            | 0.0%       | 8.5%               | 1.5%                                                                   |
| -3 - 75                            |            |                    |                                                                        |
| -2 - 74                            | 0.0%       | 3.5%               | 0.4%                                                                   |
| -1 - 73                            |            |                    |                                                                        |
| -4 - 76                            |            |                    |                                                                        |
| -3 - 75                            |            |                    |                                                                        |
| -2 - 74                            | 0.0%       | 1.8%               | 0.0%                                                                   |
| -1 - 73                            |            |                    |                                                                        |

<sup>a</sup>Numbering according to convention with the exception of positions 74–76, which do not indicate the CCA end of the mature tRNA, but the first 3 nt of the trailer of the pre-tRNA (see also Supplementary Figure S3); nucleotides of the 5' leader carry negative numbers starting from the nucleotide closest to the RNase P cleavage site with -1.

<sup>b</sup>Extensions of the acceptor stem with a single G-C base pair at the first or second upstream position; the other base pairs of the extension are either A-U or G-U.
